# Supplementary material
Source: publisher figshare collection journal article supplement (https://tandf.figshare.com/articles/dataset/_/5787513)
Supplement: Supplementary file 3 [file 2]

Archive with 3 entries (3 files):
- 1407770_ACC_Form.pdf
- CrossScreening-manual.pdf
- CrossScreening_0.0.1.tar.gz
